# Supplementary material for: Smart Pellets for Controlled Delivery of 5-Fluorouracil
Source: MDPI journal article supplement (doi:10.3390/molecules28010306), 2022-12-30
Supplement: s1 [file s1]

*Supplementary Materials*

# Smart Pellets for Controlled Delivery of 5-Fluorouracil

Mohammad F. Bayan <sup>1,\*</sup>, Abdolelah Jaradat <sup>2</sup>, Mohammad H. Alyami <sup>3,\*</sup> and Abdallah Y. Naser <sup>2</sup>

<sup>1</sup> Faculty of Pharmacy, Philadelphia University, P.O. Box 1, Amman 19392, Jordan

<sup>2</sup> Faculty of Pharmacy, Isra University, P.O. Box 33, Amman 11622, Jordan

<sup>3</sup> Department of Pharmaceutics, College of Pharmacy, Najran University, Najran 66462, Saudi Arabia

\* Correspondence: mbayan@philadelphia.edu.jo (M.F.B.); mhalmansour@nu.edu.sa (M.H.A.)

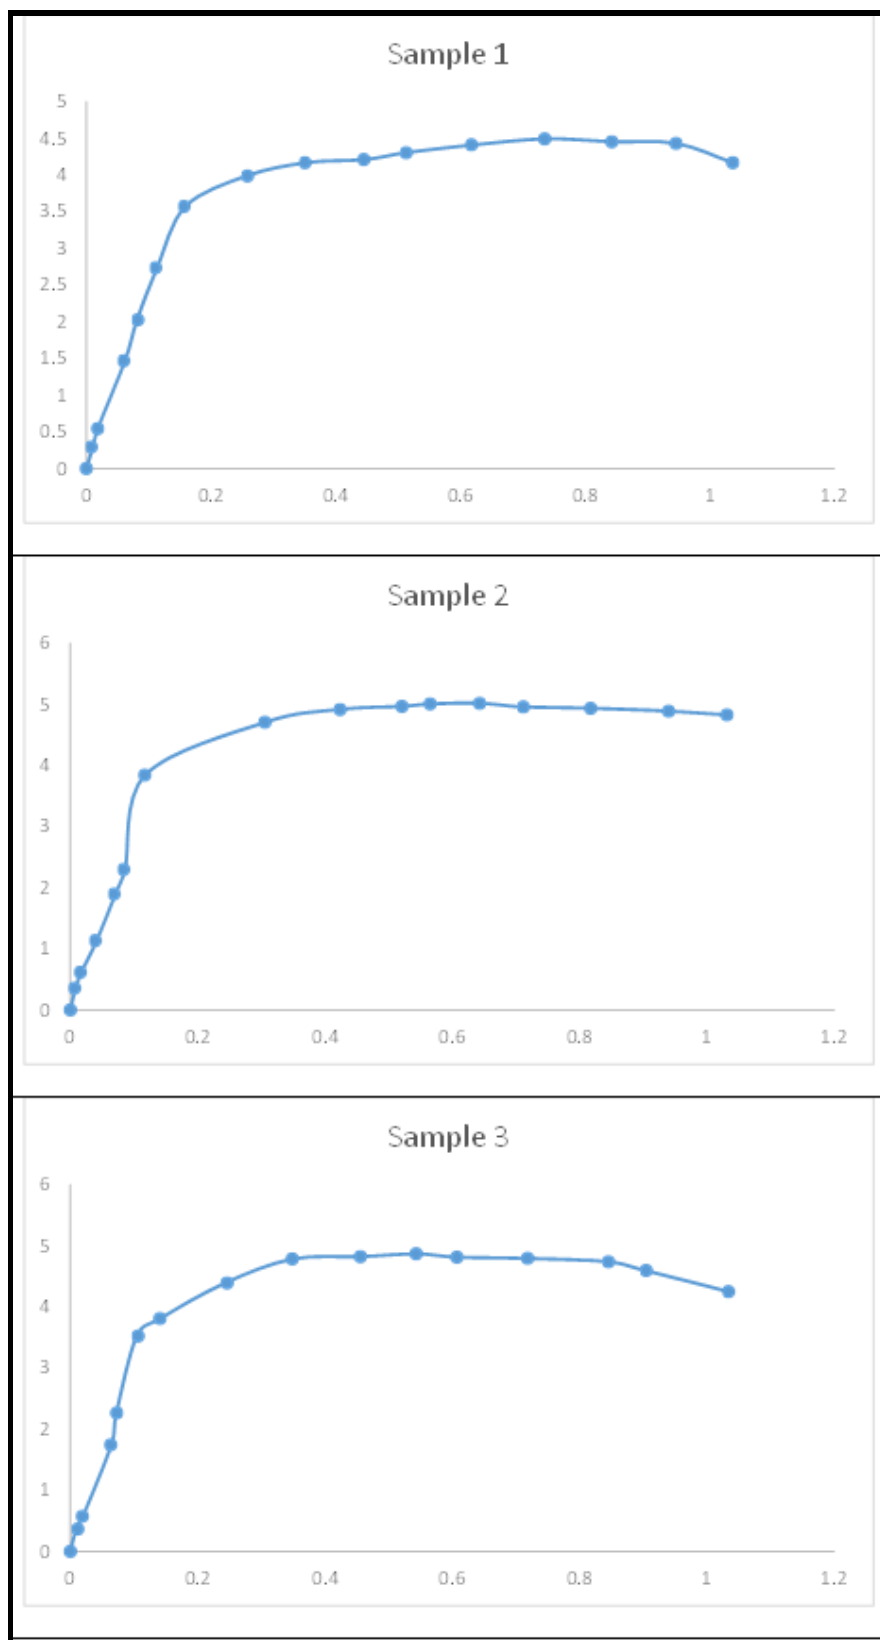

**Figure S1.** Strain-stress curves of M1

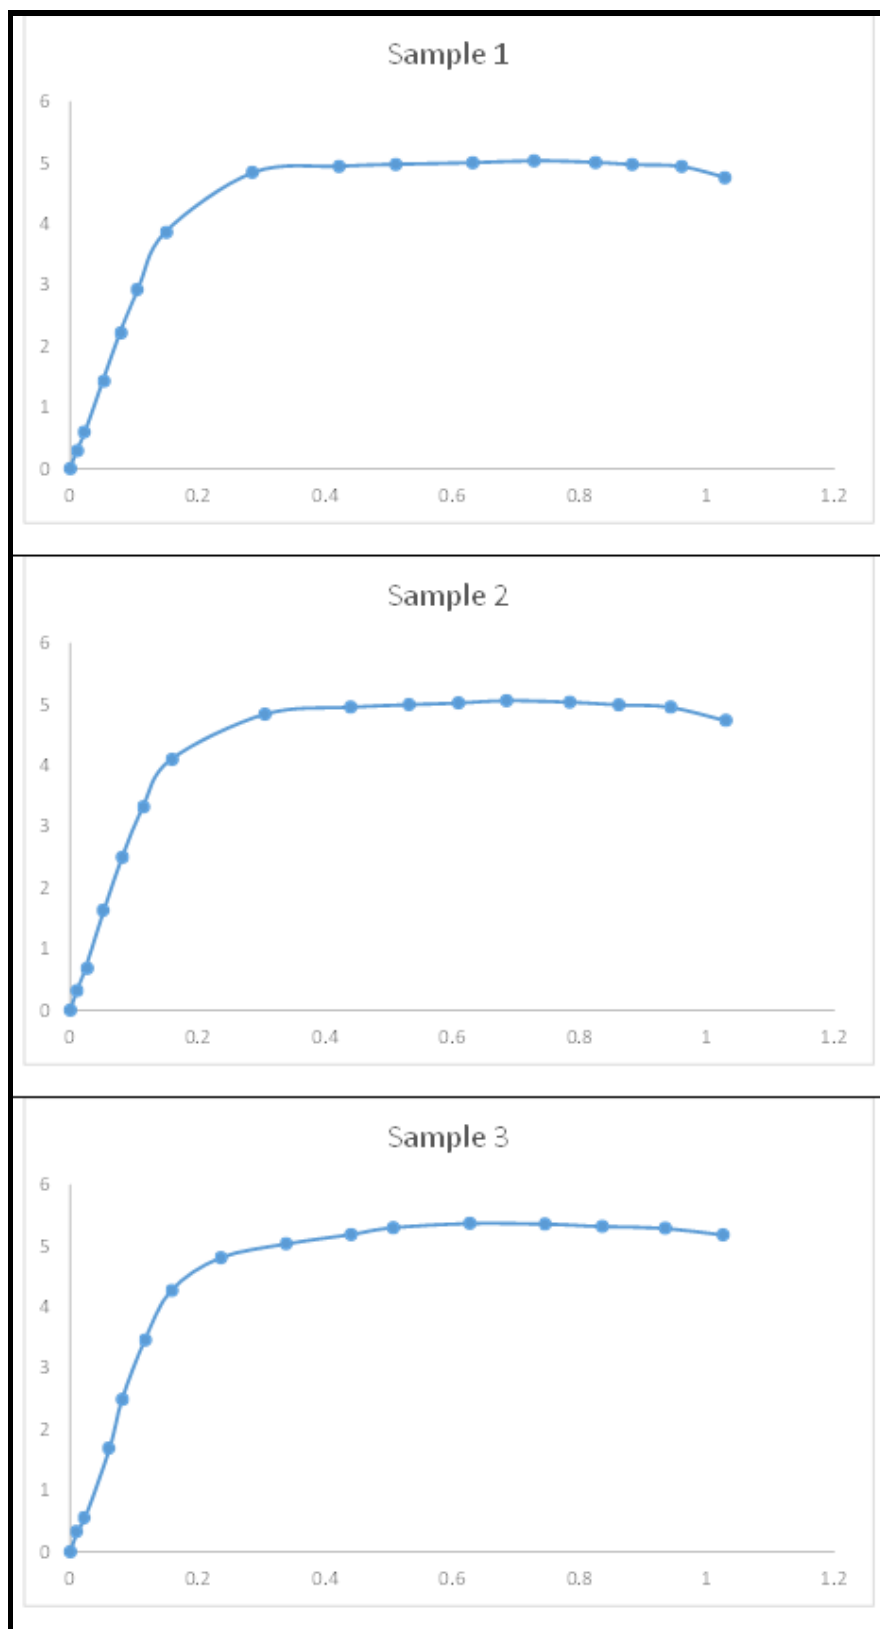

**Figure S2.** Strain-stress curves of M2

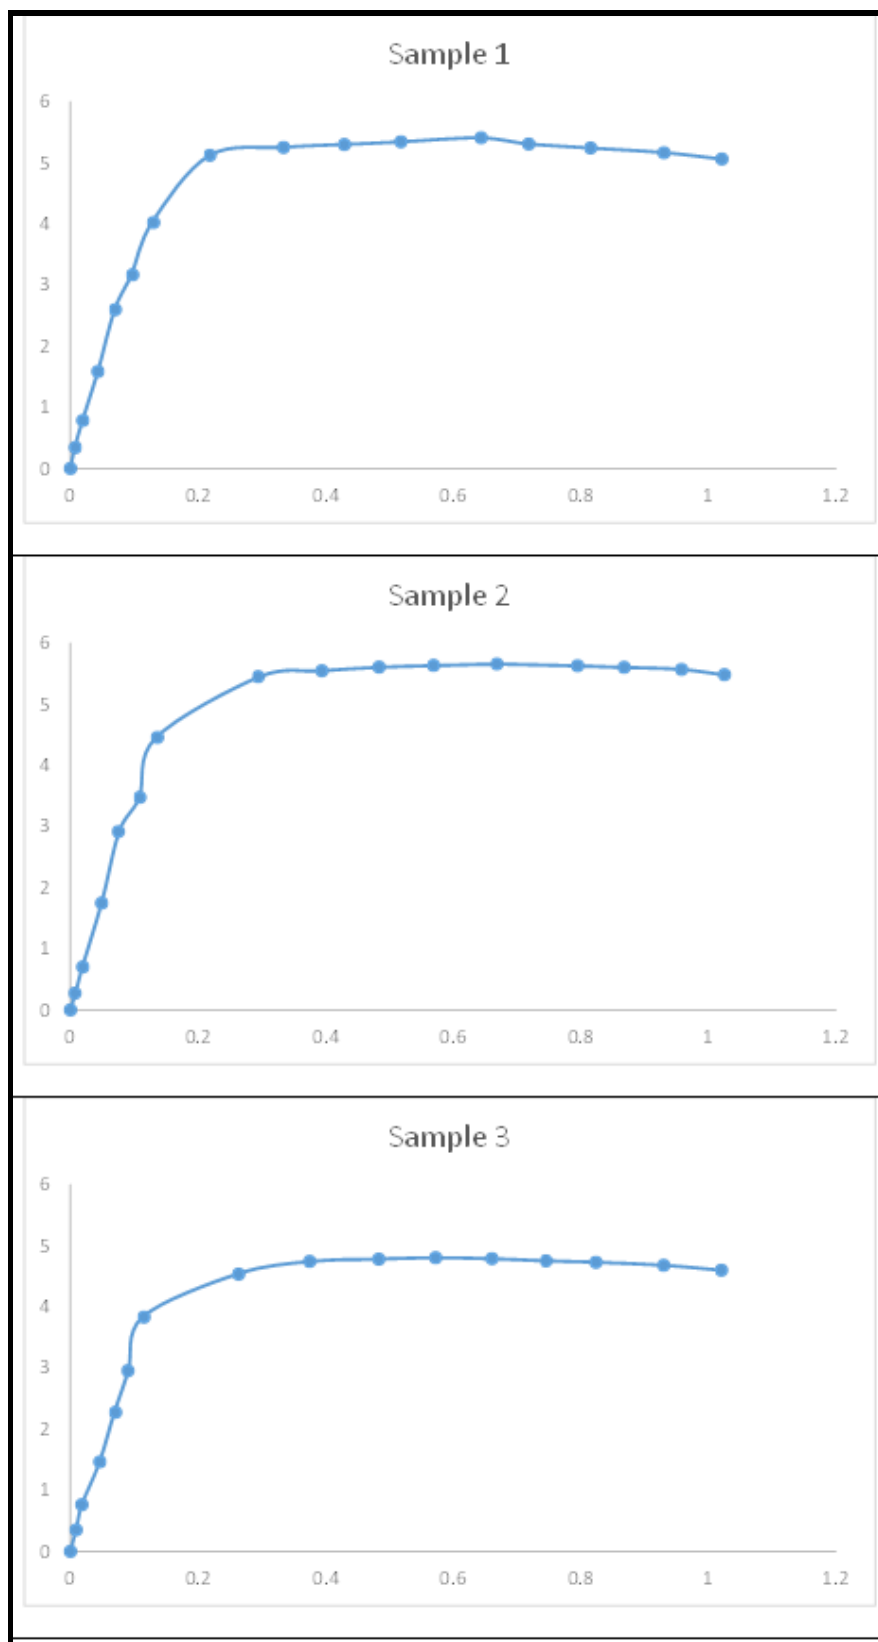

**Figure S3.** Strain-stress curves of M3

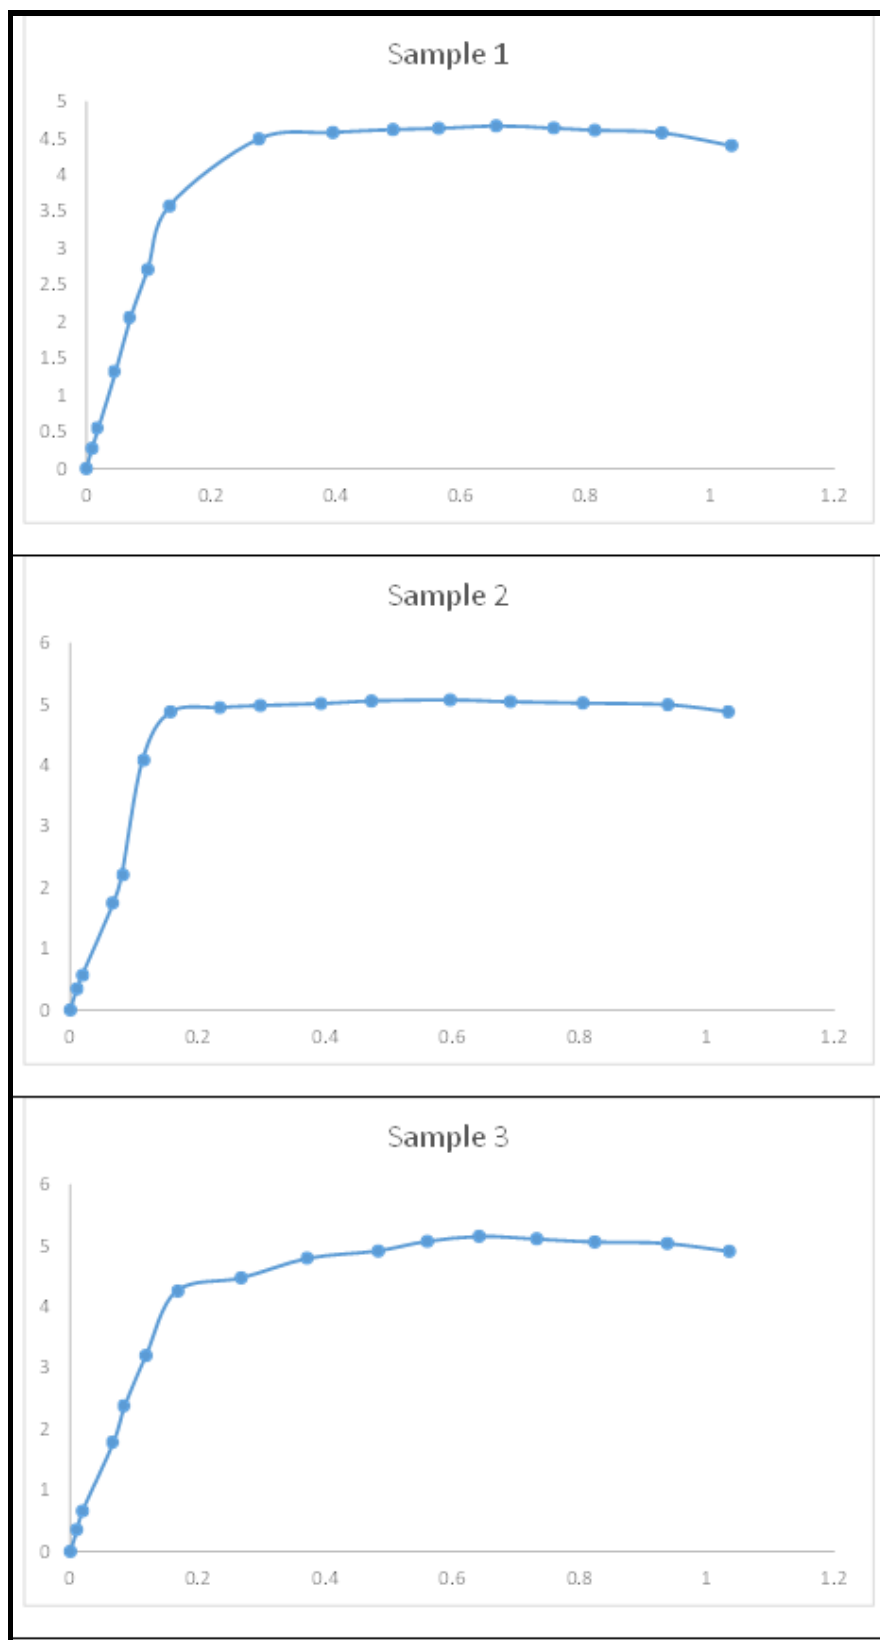

**Figure S4.** Strain-stress curves of M4

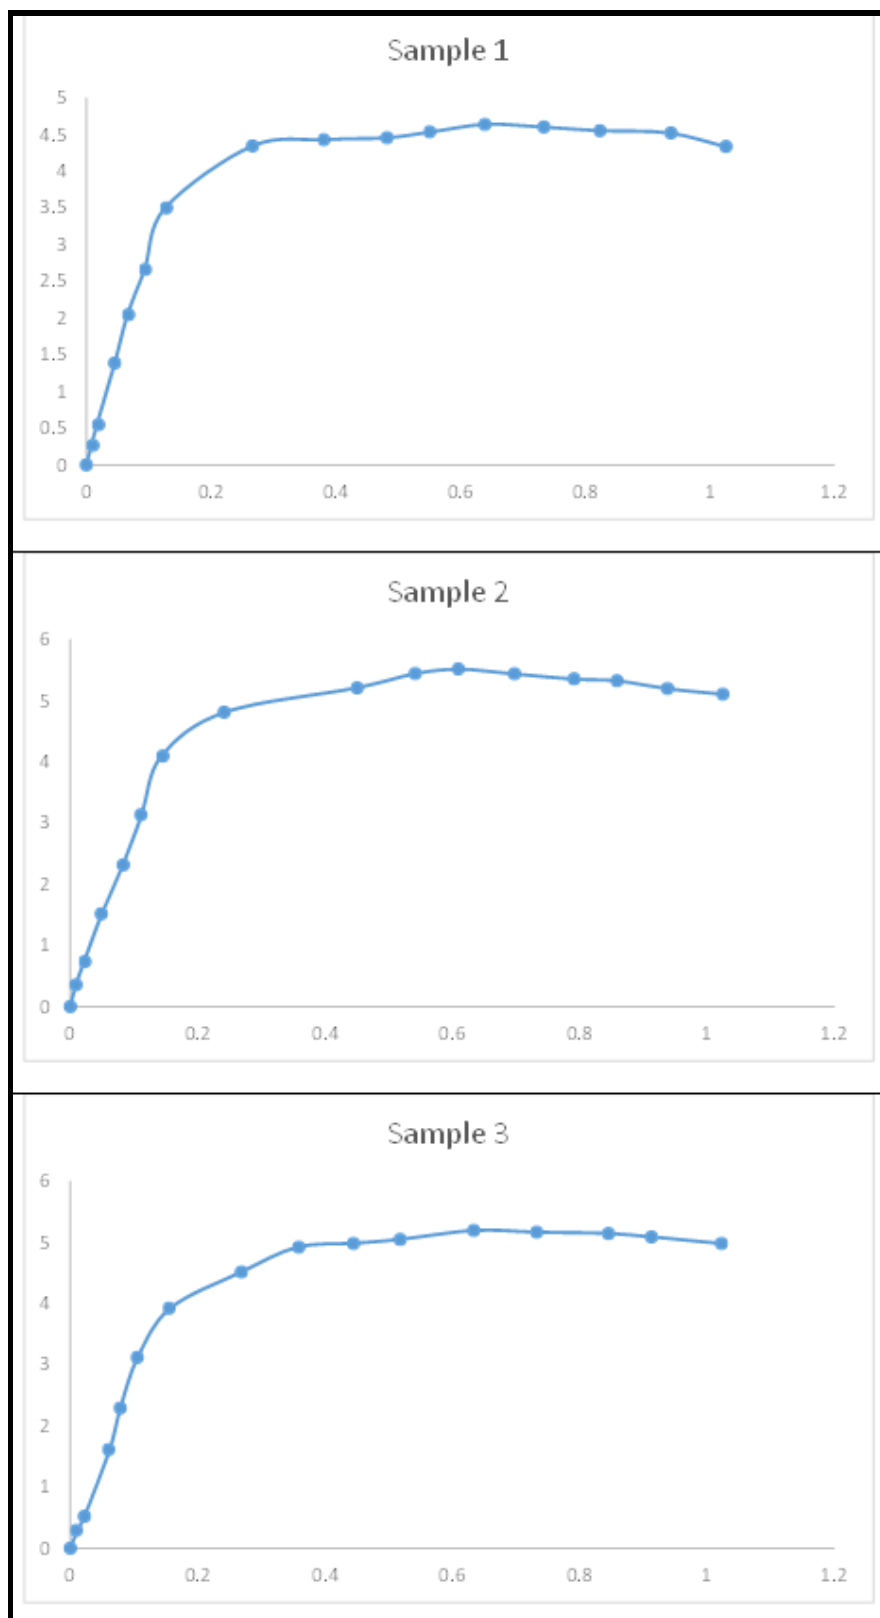

**Figure S5.** Strain-stress curves of M5

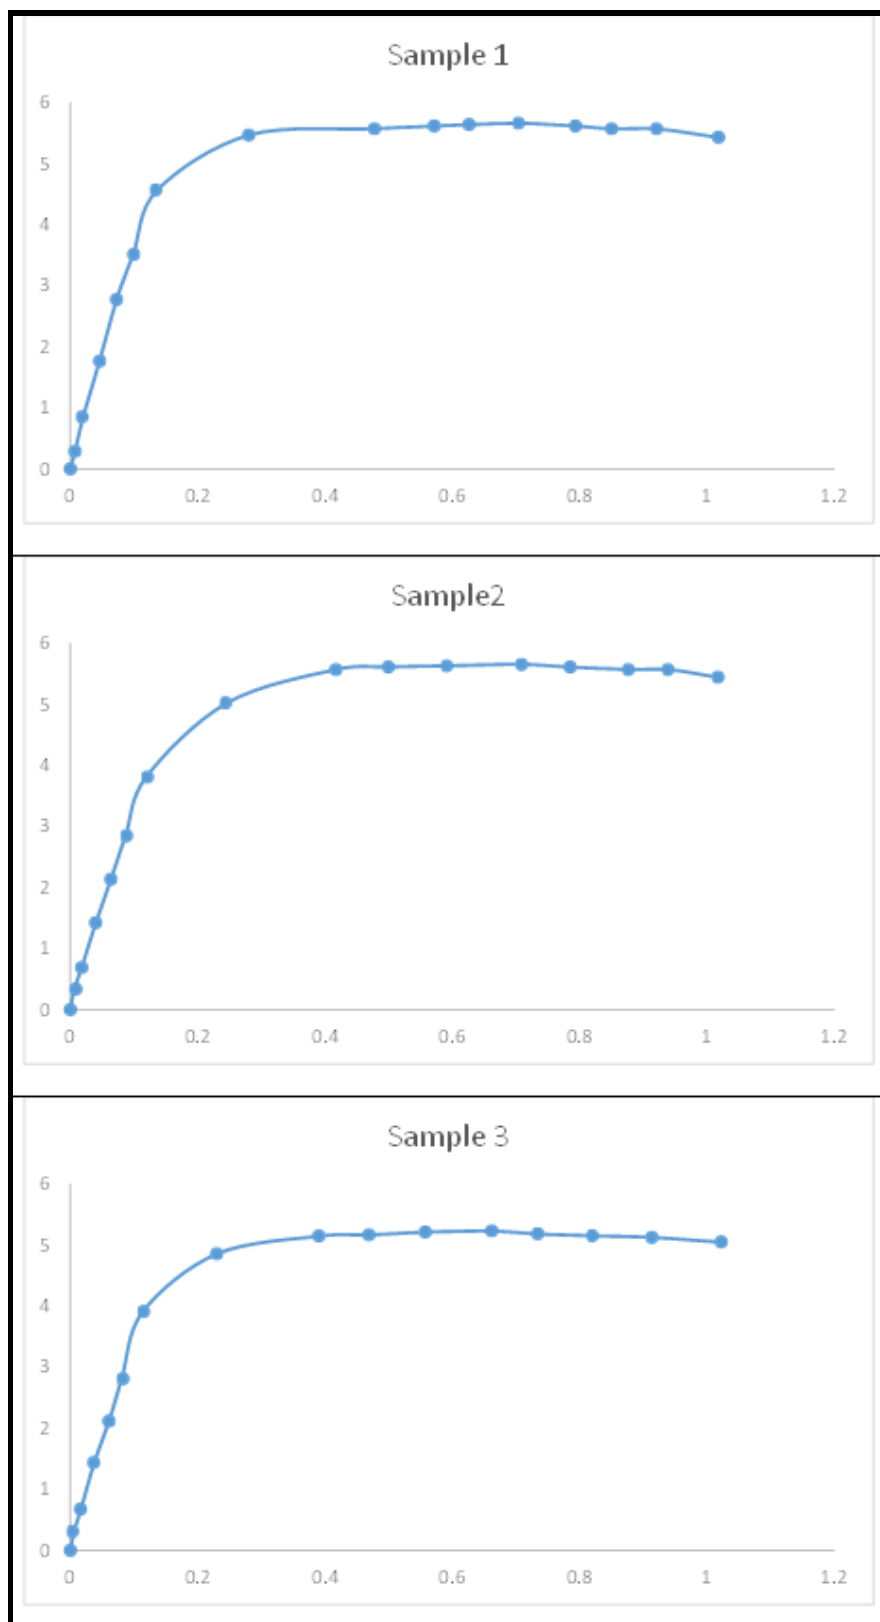

**Figure S6.** Strain-stress curves of M6

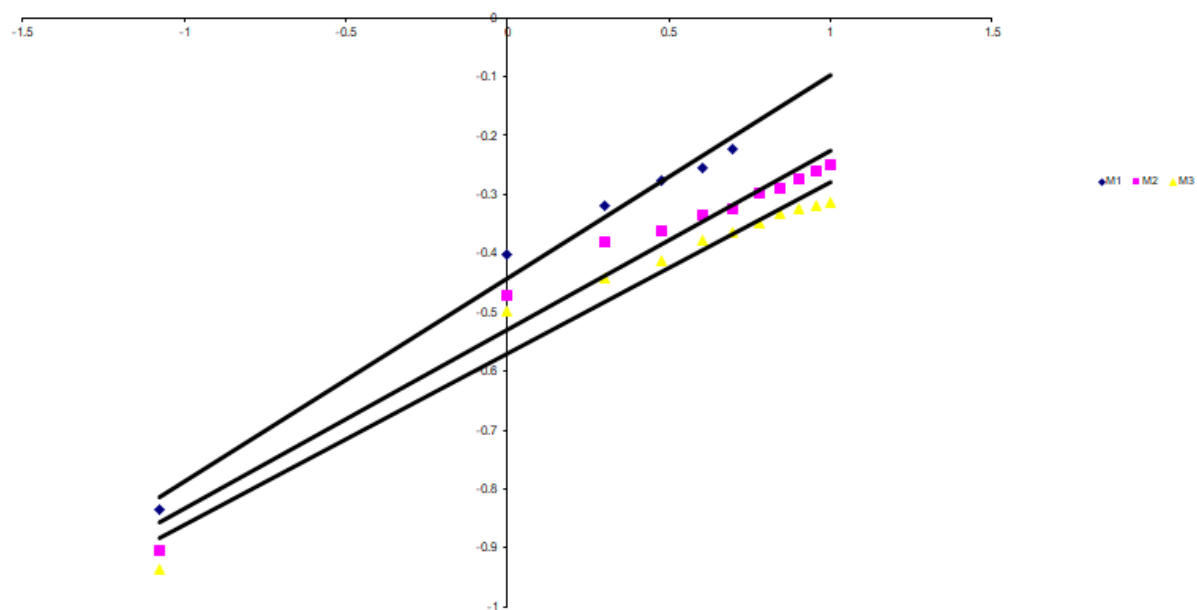

**Figure S7.** The swelling data after fitting to the Korsmeyer-Peppas model

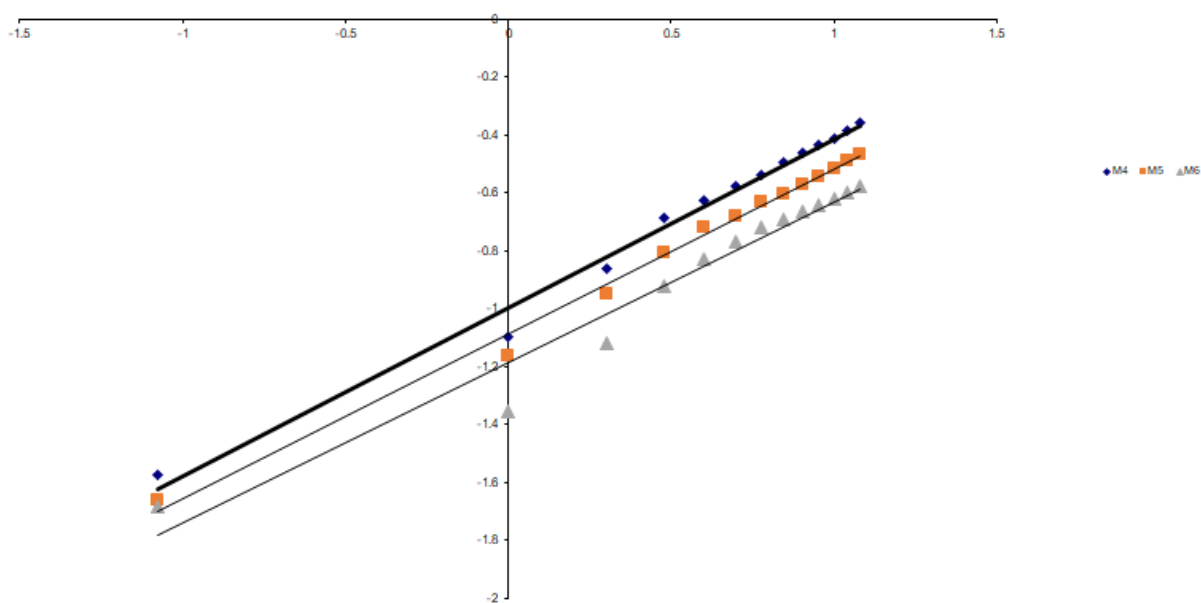

**Figure S8.** The release data after fitting to the Korsmeyer-Peppas model
